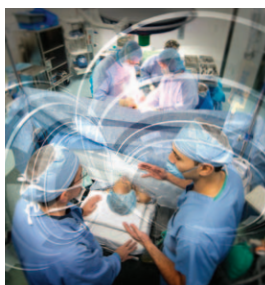

## ON THE COVER:

This themed issue focuses on original investigation and commentary in the rapidly changing world of medical education. From medical student through continuing education during practice, new approaches are being implemented and new requirements are being applied, and this issue covers both of these in a comprehensive fashion. Whether you're a first-year resident or approaching retirement, there is something in this issue for you.

|                                                                                                                                        |     |
|----------------------------------------------------------------------------------------------------------------------------------------|-----|
| ◆ THIS MONTH IN ANESTHESIOLOGY                                                                                                         | 1A  |
| ■ SCIENCE, MEDICINE, AND THE ANESTHESIOLOGIST                                                                                          | 21A |
| ■ INFOGRAPHICS IN ANESTHESIOLOGY                                                                                                       | 25A |
| ◆ EDITORIAL VIEWS                                                                                                                      |     |
| ME Introduction to the Anesthesiology Medical Education Theme Issue<br><i>A.J. Schwartz and D.J. Murray</i>                            | 1   |
| ME Avoiding Professional Extinction<br><i>M.M. Todd and L.A. Fleisher</i>                                                              | 2   |
| ME Objective Structured Clinical Examination and Board Certification in Anesthesiology<br><i>J.P. Rathmell, C. Lien, and A. Harman</i> | 4   |
| ME American Society of Anesthesiologists' Lifeline to Learning<br><i>B. Diane Gambill</i>                                              | 7   |
| On the Fabric of the Human Body and Modern Ultrasound Imaging<br><i>C.J. Gilligan and J.P. Rathmell</i>                                | 10  |
| ME Time to Flip the Pain Curriculum?<br><i>D.B. Carr and Y.S. Bradshaw</i>                                                             | 12  |
| ME But What if There Are No Teachers ...?<br><i>M.E. Durieux</i>                                                                       | 15  |
| ME Can Physician Performance Be Assessed <i>via</i> Simulation?<br><i>A. Macario</i>                                                   | 18  |

◆ Refers to This Month in Anesthesiology  
◆ Refers to Editorial Views  
ME This is a Medical Education issue article

See Supplemental Digital Content  
CME CME Article

## CONTENTS

- ME The Right Ingredients: Essential if You Want to Bake the Cake Right!** 22  
A.P. Ambardekar, S. Wortham, and A.J. Schwartz

### SPECIAL ARTICLES

- ME Competency-based Education in Anesthesiology: History and Challenges** 24  
T.J. Ebert and C.A. Fox
- ME Can Simulation Help to Answer the Demand for Echocardiography Education?** 32  
F. Clau-Terré, V. Sharma, B. Cholley, T. Gonzalez-Alujas, M. Galiñanes, A. Evangelista, and N. Fletcher
- ME “Masters of Anaesthesia”: M.S.A. Degrees during the 1893 World’s Fair from Chicago’s Post-Graduate School of Anaesthesia** 42  
G.S. Bause

### PERIOPERATIVE MEDICINE

- Despite Differences in Cytosolic Calcium Regulation, Lidocaine Toxicity Is Similar in Adult and Neonatal Rat Dorsal Root Ganglia *In Vitro*** 50  
L.V. Doan, O. Eydlin, B. Piskoun, R.P. Kline, E. Recio-Pinto, A.D. Rosenberg, T.J.J. Blanck, and F. Xu
- In a model of neuronal cultures of dorsal root ganglia neurons from postnatal day 7 and adult rats, lidocaine induced similar cytotoxic and apoptotic effects on neonatal and adult rat dorsal root ganglia neurons despite differences in their KCl-evoked calcium responses *in vitro*.
- Preoperative Thrombocytopenia and Postoperative Outcomes after Noncardiac Surgery** 62  
L.G. Glance, N. Blumberg, M.P. Eaton, S.J. Lustik, T.M. Osler, R. Wissler, R. Zollo, M. Karcz, C. Feng, and A.W. Dick
- Abnormal platelet counts were common, occurring in 1 of 14 patients. Patients with low platelet counts were more likely to require transfusion and more likely to die.

### CRITICAL CARE MEDICINE

- Immobilization with Atrophy Induces *De Novo* Expression of Neuronal Nicotinic  $\alpha 7$  Acetylcholine Receptors in Muscle Contributing to Neurotransmission** 76  
S. Lee, H. Yang, T. Sasakawa, M.A.S. Khan, A. Khatri, M. Kaneki, and J.A.J. Martyn
- After immobilization, immature nicotinic acetylcholine receptors (AChRs) did not contribute to neurotransmission, however,  $\alpha 7$ AChRs were up-regulated and also contributed to neuromuscular transmission. Resistance to clinically used muscle relaxants seen with immobilization might be related to functional expression of insensitive  $\alpha 7$ AChRs.

### PAIN MEDICINE

- ◆◆◆ Ultrasonography of the Cervical Spine: An *In Vitro* Anatomical Validation Model** 86  
M. van Eerd, J. Patijn, J.M. Sieben, M. Sommer, J. Van Zundert, M. Van Kleef, and A. Lataster
- An *in vitro* model was constructed and validated for ultrasound imaging of the cervical spine. Ultrasound images are provided for the key landmarks: mastoid process, transverse process of C1, tubercles of C6 and C7, and cervical laminae.  
SUPPLEMENTAL DIGITAL CONTENT IS AVAILABLE IN THE TEXT

## **Hamilton Acute Pain Service Safety Study: Using Root Cause Analysis to Reduce the Incidence of Adverse Events** 97

*J.E. Paul, N. Buckley, R.F. McLean, K. Antoni, D. Musson, M. Kampf, D. Buckley, M. Marcoux, R. Frketich, L. Thabane, and J. Cheng*

Comparing data from over 35,000 postoperative patients before and after a root cause analysis–led intervention showed a reduction by 1/3 in major adverse events, accompanied by an increase by 1/3 in the incidence of severe pain.

## **EDUCATION**

### IMAGES IN ANESTHESIOLOGY

## **From Simulation to Separation Surgery: A Tale of Two Twins** 110

*A.F. Simpao, R. Wong, T.J. Ferrara, H.L. Hedrick, A.J. Schwartz, T.L. Snyder, S.J. Tharakan, and P.D. Bailey, Jr.*

### ORIGINAL INVESTIGATIONS IN EDUCATION

## **Facilitation of Resident Scholarly Activity: Strategy and Outcome Analyses Using Historical Resident Cohorts and a Rank-to-Match Population** 111

*T. Sakai, T.D. Emerick, D.G. Metro, R.M. Patel, S.C. Hirsch, D.G. Winger, and Y. Xu*

Since 2006 the University of Pittsburgh instituted a series of initiatives regarding resident research, resulting in increased research involvement by faculty and productivity by residents in comparison to historical and matched controls.

## **Resident Characterization of Better-than- and Worse-than-Average Clinical Teaching** 120

*B. Haydar, J. Charnin, T. Voepel-Lewis, and K. Baker*

In a two-step process, comments from faculty evaluations over a 2-yr period at one institution were studied to identify themes associated with above- and below-average ratings by trainees. Thirteen themes were identified using trainee evaluations and these fell into four domains associated with outstanding teaching.

## **Simulation-based Assessment to Identify Critical Gaps in Safe Anesthesia Resident Performance** 129

*R.H. Blum, J.R. Boulet, J.B. Cooper, and S.L. Muret-Wagstaff; for the Harvard Assessment of Anesthesia Resident Performance Research Group*

A multisenario, simulation-based performance assessment of 22 first-year residents and 8 fellows from two institutions showed high reliability, validity, and generalizability. A majority of trainees and faculty judged the assessment to be useful, realistic, and representative of critical skills required for safe practice.

## **Building the Evidence on Simulation Validity: Comparison of Anesthesiologists' Communication Patterns in Real and Simulated Cases** 142

*J. Weller, R. Henderson, C.S. Webster, B. Shulruf, J. Torrie, E. Davies, K. Henderson, C. Frampton, and A.F. Merry*

In an evaluation of 20 anesthesiologists, communication pattern for routine cases was similar during simulation as during clinical care in the operating room, supporting the ecologic validity of simulation.

## **Simulator Training Enhances Resident Performance in Transesophageal Echocardiography** 149

*N.A. Ferrero, A.V. Bortsov, H. Arora, S.M. Martinelli, L.M. Kolarczyk, E.C. Teeter, D.A. Zvara, and P.A. Kumar*

This study showed that mannequin-based transesophageal echocardiography simulation training was superior to conventional didactic training on acquisition of good-quality echocardiographic images in patients by residents in training.

- ME Improving Faculty Feedback to Resident Trainees during a Simulated Case: A Randomized, Controlled Trial of an Educational Intervention** 160  
*R.D. Minehart, J. Rudolph, M.C.M. Pian-Smith, and D.B. Raemer*

Training improved faculty ability to maintain a psychologically safe environment, explore the resident's frame of reference, and address professionalism along with technical issues.

- Automated Near-Real-time Clinical Performance Feedback for Anesthesiology Residents: One Piece of the Milestones Puzzle** 172  
*J.M. Ehrenfeld, M.D. McEvoy, W.R. Furman, D. Snyder, and W.S. Sandberg*

An automated, near-real-time feedback system was generated from a perioperative information management system and refined using resident feedback. *SUPPLEMENTAL DIGITAL CONTENT IS AVAILABLE IN THE TEXT*

- ME Performance Assessment in Airway Management Training for Nonanesthesiology Trainees: An Analysis of 4,282 Airway Procedures Performed at a Level-1 Trauma Center** 185  
*T.E. Grissom, J. Sappenfield, S.M. Galvagno, Jr., S.V. Cherry, Y.-C.C. Chang, and P.F. Hu*

In a study of nearly 100 trainees undergoing a 4-week rotation, with over 4,200 airway procedures, first-attempt success at endotracheal intubation increased as a function of rotation week, as did self-reported laryngoscopic view.

## REVIEW ARTICLE

- Designing and Implementing the Objective Structured Clinical Examination in Anesthesiology** 196  
*M.J. Hastie, J.L. Spellman, P.P. Pagano, J. Hastie, and B.J. Egan*

This is a review of the history and current use of Objective Structured Clinical Examination, and challenges in design and implementation including the psychometrics of test design.

- Cognitive Processes in Anesthesiology Decision Making** 204  
*M.P. Stiegler and A. Tung*

Errors in medical decisions may contribute significantly to adverse events. The authors review current knowledge of nonrational cognitive processes in human decision making, identify vulnerable anesthesia decisions, and suggest strategies for mitigating effects of these processes.

- Addressing the Mandate for Hand-off Education: A Focused Review and Recommendations for Anesthesia Resident Curriculum Development and Evaluation** 218  
*M.B. Lane-Fall, A.K. Brooks, S.A. Wilkins, J.J. Davis, and L.A. Riesenber*

Hand-off and curriculum literature is reviewed to provide recommendations for anesthesia-specific resident hand-off curriculum and evaluation. *SUPPLEMENTAL DIGITAL CONTENT IS AVAILABLE IN THE TEXT*

## MIND TO MIND

- ME Pulmonary Pathophysiology in Another Galaxy** 230  
*R.R. Plovsing and R.M.G. Berg*

- Secrets of a Resident** 233  
*J. Whitson-West*

- ME A Place to Stand** 234  
*B.W. Taha*

- ME My Understanding of Being an Anesthesiologist** 236  
*L. Qiu and Y. Chen*

## CONTENTS

### ■ CORRESPONDENCE

**Complexities of Basic Science** 238  
*J.C. Sill*

**In Reply**  
*J.C. Eisenach and J.P. Rathmell*

---

**Performance of Retrograde Light-guided Laryngoscopy for Tracheal Intubation** 239  
*F. Xue, X.L. Cui and Y. Cheng*

**Backward, Upward, Rightward Pressure (BURP) Effect Improves the Glottic View in Retrograde Light-guided Laryngoscopy for Tracheal Intubation**  
*C. Cherng*

**In Reply**  
*T. Yang, J. Hou, and X. Deng*

---

**Applying Systematic Criteria for Type and Screen Based on Procedure's Probability of Erythrocyte Transfusion** 241  
*F. Dexter and R.H. Epstein*

**In Reply**  
*S.M. Frank*

---

**Factor Eight Inhibitor Bypass Activity for Novel Oral Anticoagulant Reversal** 242  
*A.M.-H. Ho*

**In Reply**  
*J.H. Levy*

---

**Acute Kidney Injury, Surgery, and Angiotensin Axis Blockade** 243  
*B. Mets and E. Hennrikus*

**In Reply**  
*M. Legrand and D. Payen*

---

**The Overpowered Mega-study Is a New Class of Study Needing a New Way of Being Reviewed** 245  
*R.M. Raw, M.M. Todd, B.J. Hindman, R. Mueller*

**In Reply**  
*S.G. Memtsoudis*

### ■ ANESTHESIOLOGY REFLECTIONS FROM THE WOOD LIBRARY-MUSEUM

**Dr. Paul M. Wood, Diplomate of the American Board of Anesthesiology** 6  
*George S. Bause*

**An 1869 Engraving of the Ether Monument** 9  
*George S. Bause*

**Professor Ralph Waters' Hickman Medal** 159  
*George S. Bause*

## CONTENTS

### ■ REVIEWS OF EDUCATIONAL MATERIAL

248

### ■ ANNOUNCEMENTS

249

### ■ CAREERS & EVENTS

27A

## INSTRUCTIONS FOR AUTHORS

The most recently updated version of the Instructions for Authors is available at [www.anesthesiology.org](http://www.anesthesiology.org). Please refer to the Instructions for the preparation of any material for submission to ANESTHESIOLOGY.

Manuscripts submitted for consideration for publication must be submitted in electronic format. The preferred method is via the Journal's Web site (<http://www.anesthesiology.org>). Detailed directions for submissions and the most recent version of the Instructions for Authors can be found on the Web site (<http://www.anesthesiology.org>). Books and educational materials should be sent to Michael J. Avram, Ph.D., Diplomate, ABCP, Associate Professor of Anesthesiology, Director, Mary Beth Donnelley Clinical Pharmacology Core Facility of the Robert H. Lurie Comprehensive Cancer Center, Northwestern University Feinberg School of Medicine, 300 E. Superior Street, Tarry 4-735, Chicago, Illinois 60611. Requests for permission to duplicate materials published in ANESTHESIOLOGY should be submitted in electronic format, to the Permissions Department ([journalpermissions@lww.com](mailto:journalpermissions@lww.com)). Advertising and related correspondence should be addressed to Advertising Manager, ANESTHESIOLOGY, Lippincott Williams & Wilkins, Two Commerce Square, 2001 Market Street, Philadelphia, Pennsylvania 19103 (Web site: <http://www.lww.com/advertisingratecards/>). Publication of an advertisement in ANESTHESIOLOGY does not constitute endorsement by the Society or Lippincott Williams & Wilkins, Inc. of the product or service described therein or of any representations made by the advertiser with respect to the product or service.

**ANESTHESIOLOGY** (ISSN 0003-3022) is published monthly by Lippincott Williams & Wilkins, 16522 Hunters Green Parkway, Hagerstown, MD 21740-2116. Business office: Two Commerce Square, 2001 Market Street, Philadelphia, PA 19103. Periodicals postage paid at Hagerstown, MD, and at additional mailing offices. Copyright © 2013, the American Society of Anesthesiologists, Inc.

**Annual Subscription Rates:** *United States*—\$758 Individual, \$1431 Institution, \$304 In-training. *Rest of World*—\$800 Individual, \$1589 Institution, \$304 In-training. Single copy rate \$132. Subscriptions outside of North America must add \$52 for airfreight delivery. Add state sales tax, where applicable. The GST tax of 7% must be added to all orders shipped to Canada (Lippincott Williams & Wilkins' GST Identification #895524239, Publications Mail Agreement #1119672). Indicate in-training status and name of institution. Institution rates apply to libraries, hospitals, corporations, and partnerships of three or more individuals. Subscription prices outside the United States must be prepaid. Prices subject to change without notice. Subscriptions will begin with currently available issue unless otherwise requested. Visit us online at [www.lww.com](http://www.lww.com).

Individual and in-training subscription rates include print and access to the online version. Online-only subscriptions for individuals (\$257) and persons in training (\$257) are available to nonmembers and may be ordered by downloading a copy of the Online Subscription FAXback Form from the Web site, completing the information requested, and faxing the completed form to 301-223-2400/44 (0) 20 7981 0535. Institutional rates are for print only; online subscriptions are available via Ovid. Institutions can choose to purchase a print and online subscription together for a discounted rate. Institutions that wish to purchase a print subscription, please contact Lippincott Williams & Wilkins, 16522 Hunters Green Parkway, Hagerstown, MD 21740-2116; phone: 1-800-638-3030 (outside the United States 301-223-2300/44 (0) 20 7981 0525); fax: 301-223-2400/44 (0) 20 7981 0535. Institutions that wish to purchase an online subscription or online with print, please contact the Ovid Regional Sales Office near you or visit [www.ovid.com/site/index.jsp](http://www.ovid.com/site/index.jsp) and select Contact and Locations.

**Address for non-member subscription information, orders, or change of address:** Lippincott Williams & Wilkins, 16522 Hunters Green Parkway, Hagerstown, MD 21740-2116; phone: 1-800-638-3030 (outside the United States 301-223-2300/44 (0) 20 7981 0525); fax: 301-223-2400/44 (0) 20 7981 0535; email: [customerservice@lww.com](mailto:customerservice@lww.com). In Japan, contact LWW Japan Ltd., 3-23-14 Hongo, Bunkyo-ku, Tokyo 113, Japan; phone: 81-3-5689-5400; fax: 81-3-5689-5402; email: [bclaim@lww.co.jp](mailto:bclaim@lww.co.jp). In Bangladesh, India, Nepal, Pakistan, and Sri Lanka, contact Globe Publications Pvt. Ltd., B-13 3rd Floor, A Block, Shopping Complex, Naraina, Vihar, Ring Road, New Delhi 110028, India; phone: 91-11-25770411; fax: 91-11-25778876; email: [info@globeup.com](mailto:info@globeup.com).

**Address for member subscription information, orders, or change of address:** Members of the American Society of Anesthesiologists receive the print and online journal with their membership. To become a member or provide a change of address, please contact the American Society of Anesthesiologists, 520 N. Northwest Highway, Park Ridge, IL 60068-2573; phone: 847-825-5586; fax: 847-825-1692; email: [membership@ASAhq.org](mailto:membership@ASAhq.org). For all other membership inquiries, contact Lippincott Williams & Wilkins Customer Service Department, P.O. Box 1580, Hagerstown, MD 21741-1580; phone: 1-800-638-3030 (outside the United States 301-223-2300/44 (0) 20 7981 0525); fax: 301-223-2400/44 (0) 20 7981 0535; email: [memberservice@lww.com](mailto:memberservice@lww.com).

**Postmaster:** Send address changes to ANESTHESIOLOGY, P.O. BOX 1550, Hagerstown, MD 21740.

**Advertising:** Please contact Michelle Smith, Senior Account Manager, Advertising, Lippincott Williams & Wilkins, 333 Seventh Avenue, 19th Floor, New York, NY 10001; tel: (646) 674-6537, fax: (646) 607-5479, e-mail: [Michelle.Smith@wolterskluwer.com](mailto:Michelle.Smith@wolterskluwer.com). For classified advertising: Keida Spurlock, Recruitment Advertising Representative, Lippincott Williams & Wilkins, Two Commerce Square, 2001 Market Street, Philadelphia, PA 19103; tel: (215) 521-8501, fax: (215) 689-2453, e-mail: [Keida.Spurlock@wolterskluwer.com](mailto:Keida.Spurlock@wolterskluwer.com).
